# Supplementary material
Source: PubMed Central journal article supplement (PMC3839769)
Supplement: 1315927110_sapp.pdf [file 1315927110_sapp.pdf]

## Supporting Information for

### **Organophosphonate-degrading PhnZ reveals an emerging family of HD-domain mixed-valent diiron oxygenases**

Bigna Wörsdörfer,<sup>1,\*</sup> Mahesh Lingaraju,<sup>2</sup> Neela Yennawar,<sup>3</sup> Amie K. Boal,<sup>1,2</sup> Carsten Krebs,<sup>1,2</sup> J. Martin Bollinger, Jr.,<sup>1,2,\*</sup> Maria-Eirini Pandelia<sup>1,\*</sup>

*<sup>1</sup>Department of Chemistry, <sup>2</sup>Department of Biochemistry and Molecular Biology, and <sup>3</sup>Huck Institutes of the Life Sciences, The Pennsylvania State University, University Park, PA 16802, USA*

\*Corresponding authors:

mpandelia@gmail.com; jmb21@psu.edu; bigna.woe@gmail.com

## Materials

Buffers, salts and other chemicals were purchased from commercial suppliers unless otherwise stated. Metallic  $^{57}\text{Fe}$  was purchased from Isoflex (USA).

## Protein production and purification

The genes for PhnZ (GeneBank ID: ACU83550) and PhnY (GeneBank ID: ACU83549) were codon-optimized for expression in *E. coli*, synthesized, and inserted into the plasmid pRSET\_A\_A185 at its *XhoI* and *EcoRI* restriction sites by GeneArt. The resulting plasmids pRSET\_*phnZ* and pRSET\_*phnY* encode the PhnZ and PhnY proteins with N-terminal His<sub>6</sub>-tags. For PhnY, the codon-optimized gene was PCR amplified from the purchased pRSET\_*phnY* plasmid and subcloned into a pET28a vector using *NdeI* and *XhoI* restriction enzymes, resulting in the plasmid pET28a\_*phnY* encoding the *phnY* gene with an N-terminal His<sub>6</sub>-tag.

PhnZ was overexpressed in *E. coli* BL21 cells that had been transformed with the plasmid pRSET\_*phnZ*. Cultures were grown at 30 °C in enriched LB medium supplemented with ampicillin (0.15 mg/mL) to an OD<sub>600</sub> of 0.7, at which point PhnZ production was induced by addition of isopropyl-β-D-1-thiogalactopyranoside (IPTG) to 0.5 mM. 4 hours after induction, the cells were harvested by centrifugation at 6,000 *g* for 15 min at 4 °C. To obtain  $^{57}\text{Fe}$ -labeled PhnZ for Mössbauer spectroscopy, *E. coli* BL21 cells containing the plasmid pRSET\_*phnZ* were grown in M9 minimal medium (with 0.4% (w/v) glucose) supplemented with ampicillin (0.15 mg/mL) and 100 μM  $^{57}\text{Fe}^{\text{II}}$  at 37 °C to an OD<sub>600</sub> of 0.7, at which point PhnZ production was induced by addition of IPTG to 0.5 mM and the temperature was reduced to 18 °C. 20 to 24 hours after induction, the cells were harvested by centrifugation. The cell mass was resuspended in 4 mL/g lysis buffer (50 mM MOPS pH 7.5, 300 mM NaCl, 10 mM imidazole) supplemented with 1 mM phenylmethylsulfonyl fluoride (PMSF), and the cells were lysed by two passages through a French Pressure cell. The cell lysate was cleared by centrifugation at 22,000 *g* for 30 min at 4 °C and loaded onto a gravity flow Ni<sup>2+</sup>-NTA agarose (Macherey-Nagel) column that had been equilibrated with lysis buffer. After the column was washed with 2 column volumes (CV) lysis buffer, 2 CV lysis buffer containing 20 mM imidazole, and 2 CV lysis buffer containing 40 mM imidazole, PhnZ was eluted with buffer containing 50 mM MOPS pH 7.5, 100 mM NaCl, and 250 mM imidazole.

For overexpression of PhnY, *E. coli* BL21 cells that had been transformed with the plasmid pET28a\_*phnY* were grown at 30 °C in enriched LB medium supplemented with kanamycin (0.05 mg/mL) to an OD<sub>600</sub> of 0.7, at which point PhnY production was induced by addition of IPTG to 0.1 mM and the temperature was reduced to 15 °C. 25 hours after induction, the cells were

harvested by centrifugation at 6,000 *g* for 15 min at 4 °C. Cleared cell lysate was prepared as described for PhnZ and loaded onto a gravity flow Ni<sup>2+</sup>-NTA agarose (Macherey-Nagel) column that had been equilibrated with lysis buffer. After the column was washed with 2 CV lysis buffer and 2 CV lysis buffer containing 40 mM imidazole, PhnY was eluted with buffer containing 50 mM MOPS pH 7.5, 100 mM NaCl, and 250 mM imidazole.

The eluted proteins were concentrated in Centriprep YM-10 centrifugal concentrators (Millipore) and exchanged into MOPS buffer (50 mM MOPS pH 7.5, 10% (v/v) glycerol) using a PD-10 column (GE Healthcare). Protein purity was assessed by SDS-PAGE, and protein concentrations were determined using  $\epsilon_{280\text{nm}} = 31.4 \text{ mM}^{-1} \text{ cm}^{-1}$  for PhnZ and  $\epsilon_{280\text{nm}} = 48.36 \text{ mM}^{-1} \text{ cm}^{-1}$  for PhnY as determined on the basis of the amino acid sequence by the ProtParam tool of ExPASy (<http://web.expasy.org/protparam/>) (1). The Fe content was determined by ferrozine assay (2). Iron and other trace metals in the samples were quantified by inductively-coupled plasma atomic emission spectroscopy (ICP-AES) by Henry Gong at the Penn State Materials Characterization Laboratory (3). PhnZ typically contained  $1.2 \pm 0.2$  Fe per monomer and no significant quantities of other divalent metals.

### **Enzymatic synthesis of 2-amino-1-hydroxyethylphosphonate by PhnY**

The 200 mL reaction contained 5  $\mu\text{M}$  PhnY, 10  $\mu\text{M}$   $\text{Fe}(\text{NH}_4)_2(\text{SO}_4)_2$ , 3 mM  $\alpha$ -ketoglutarate ( $\alpha$ -KG), 100  $\mu\text{M}$  sodium L-ascorbate, and 2 mM 2-aminoethylphosphonate (2-AEP) in 25 mM ammonium acetate buffer pH 7.5. Initially, PhnY was added to an O<sub>2</sub>-free mixture of the  $\text{Fe}(\text{NH}_4)_2(\text{SO}_4)_2$ , L-ascorbate,  $\alpha$ -KG, and 2-AEP in 26 mL ammonium acetate buffer after adjusting the pH to 7.5 with concentrated ammonium hydroxide (NH<sub>4</sub>OH). The reaction was transferred outside the anoxic chamber, initiated by the addition of 174 mL air-saturated ammonium acetate buffer, and then continuously flushed with hydrated air under gentle stirring at room temperature. Conversion of 2-AEP to 2-amino-1-hydroxyethylphosphonate (OH-AEP) was monitored by <sup>31</sup>P-NMR: 480  $\mu\text{L}$  aliquots were taken and quenched by heating to 85 °C for 15 min, and NMR samples were prepared as described in the <sup>31</sup>P-NMR spectroscopy section below. After complete conversion of 2-AEP to OH-AEP, the reaction was quenched by incubation at 80 °C for 20 min, and the precipitate was removed by centrifugation at 7,500  $\times g$  for 15 min at 4 °C followed by filtration through a 0.2  $\mu\text{M}$  filter.

The product OH-AEP was purified using a gravity-flow column with 20 mL of Q-Sepharose FF resin (GE Healthcare). The pH of the filtered solution was adjusted to 8.5 with concentrated ammonium hydroxide and then loaded onto the Q-Sepharose column that had been equilibrated with 25 mM ammonium acetate buffer pH 8.5. OH-AEP was eluted from the column by 3 CV of

25 mM ammonium acetate buffer pH 8.5. The L-ascorbate and succinate from the reaction mixture remain bound to the column under these conditions and elute at ammonium acetate concentrations of > 200 mM. The eluted fractions were analyzed by mass spectrometry (ZQ 2000 mass spectrometer, Waters) and  $^{31}\text{P}$ -NMR spectroscopy, and fractions containing OH-AEP (the flow-through and the three 25 mM ammonium acetate elutions) were pooled and evaporated to dryness on a rotary evaporator. The solid was dissolved in a minimal volume of  $\text{H}_2\text{O}$ , and the concentration of OH-AEP was determined by  $^{31}\text{P}$ -NMR spectroscopy using 2-AEP as an internal standard. The OH-AEP solution was aliquoted and dried using a speedvac concentrator (Savant SPD131DDA, Thermo Scientific).

The specific optical rotation of the purified OH-AEP dissolved in  $\text{H}_2\text{O}$  was determined to be  $[\alpha]_{\text{D}}^{20} = -40.2$  in good agreement with the previously determined literature value for (*R*)-OH-AEP ( $-31.4$ ) (4).

### Activity assays for PhnZ

For activity assays, the  $\text{Fe}^{\text{II}}/\text{Fe}^{\text{III}}$  state of the protein was generated by reduction of the purified protein with L-ascorbate; the fully oxidized  $\text{Fe}^{\text{III}}/\text{Fe}^{\text{III}}$  state was prepared by treatment of the protein with potassium ferricyanide ( $\text{K}_3[\text{Fe}(\text{CN})_6]$ ). 200  $\mu\text{M}$  PhnZ was incubated in the absence of  $\text{O}_2$  with 5 equiv. L-ascorbate (relative to the diiron cofactor), 0.2 equiv. ferricyanide, or 0.2 equiv. ferricyanide followed by 5.2 equiv. L-ascorbate in 50 mM MOPS pH 7.5, 10% (v/v) glycerol for a several minutes. EPR samples were taken to determine the yield of the mixed-valent  $\text{Fe}^{\text{II}}/\text{Fe}^{\text{III}}$  cofactor in these preparations. For the reaction in the absence of  $\text{O}_2$ , PhnZ was diluted with deoxygenated MOPS buffer to a final concentration of 10  $\mu\text{M}$ , and OH-AEP substrate was added to 2 mM. The solution was incubated anaerobically under gentle stirring at room temperature. For reactions with  $\text{O}_2$ , the protein was taken out of the anoxic chamber and diluted to a final concentration of 10  $\mu\text{M}$  with air-saturated MOPS buffer, OH-AEP substrate was added to 2 mM, and the reactions were continuously flushed with hydrated air under gentle stirring at room temperature.

At various time points, 480  $\mu\text{L}$  aliquots were taken and quenched by addition of 4% (v/v) concentrated acetic acid. Conversion of OH-AEP to phosphate was detected by  $^{31}\text{P}$ -NMR, as described in the  $^{31}\text{P}$ -NMR spectroscopy section below.

### PhnZ activity assays for testing $\text{O}_2$ incorporation into the product

Reactions contained 10  $\mu\text{M}$  PhnZ enriched in the  $\text{Fe}^{\text{II}}/\text{Fe}^{\text{III}}$  state, 1 mM OH-AEP and were initiated by the addition of  $^{18}\text{O}_2$ - or  $^{16}\text{O}_2$ -saturated  $\text{H}_2\text{O}$  ( $\sim 1.8$  mM  $\text{O}_2$ ), resulting in a final  $\text{O}_2$

concentration of ~1.6 mM. After 1 h the reactions were stopped by addition of 0.5% (v/v) concentrated acetic acid. Precipitation was removed by centrifugation. Incorporation of oxygen from O<sub>2</sub> into the product glycine was detected by LC-MS, as described in the LC-MS section below.

### High performance liquid chromatography – mass spectrometry (LC-MS)

LC-MS experiments were carried out on an Agilent 1200 series LC system coupled to a triple quadrupole mass spectrometer (Agilent 6410 QQQ LC/MS; Agilent Technologies). 60% (v/v) acetonitrile was added to the samples and they were filtered (0.2 μm filter) before injection on a ZIC-HILIC (Merck) column that had been equilibrated with 5% solvent A (95% H<sub>2</sub>O, 5% acetonitrile, 0.1% formic acid) and 95% solvent B (5% H<sub>2</sub>O, 95% acetonitrile, 0.1% formic acid). The reaction mixture was separated at 0.3 mL/min by applying a linear gradient of 5-20% A over 15 min, isocratic at 20% A for 5 min, a linear gradient of 20-70% A over 15 min, then returning to 5% A over 15 min and re-equilibrating at 5% A for 5 min. Detection of the glycine products was performed using electrospray ionization in the positive mode (ESI+) with single ion monitoring at *m/z* of 76.1 for detection of <sup>16</sup>O-glycine (H<sub>3</sub>N-CH<sub>2</sub>-C<sup>16</sup>O<sup>16</sup>OH)<sup>1+</sup> and *m/z* of 78.1 for detection of <sup>18</sup>O-glycine (H<sub>3</sub>N-CH<sub>2</sub>-C<sup>16</sup>O<sup>18</sup>OH)<sup>1+</sup>. Relative quantities of <sup>16</sup>O-glycine and <sup>18</sup>O-glycine were determined by integrating the corresponding peak using the MassHunter QualitativeAnalysis Software (Agilent Technologies).

### Rapid freeze-quench EPR sample preparation

An anaerobic solution of PhnZ containing 0.18 mM Fe<sup>II</sup>/Fe<sup>III</sup> cofactor and 3 mM (*R*)-OH-AEP was prepared and transferred to a gas-tight freeze-quench (FQ) syringe. A second syringe was filled with O<sub>2</sub>-saturated buffer (~1.8 mM O<sub>2</sub>, 50 mM MOPS pH 7.5, 10% (v/v) glycerol). The solution of the substrate-bound complex (PhnZ-Fe<sup>II</sup>/Fe<sup>III</sup>•(*R*)-OH-AEP) was mixed at 5 °C with 0.5 equivalent volumes of the O<sub>2</sub>-saturated buffer in the FQ set-up that has previously been described (5), affording final concentrations of 0.121 mM PhnZ-Fe<sup>II</sup>/Fe<sup>III</sup>, 2 mM (*R*)-OH-AEP and 0.6 mM O<sub>2</sub>. The reaction solution was aged for the desired time and then ejected into the isopentane cryo-solvent (~ -150° C) to terminate the reaction.

### <sup>31</sup>P-NMR spectroscopy

For <sup>31</sup>P-NMR measurements, sodium dithionite, EDTA and D<sub>2</sub>O were added to the samples to final concentrations of 0.2 mM, 0.2 mM, and 20% (v/v), respectively. Solution <sup>31</sup>P-NMR spectra of the various phosphorous containing compounds were recorded at room temperature

in an AVX-360 Bruker spectrometer. The spectra were recorded using a 1D sequence with power-gated  $^1\text{H}$  decoupling. Chemical shifts are quoted with respect to an 85% phosphoric acid solution at 0 ppm. The 85% phosphoric acid solution was transferred into a 2 mm OD quartz tube, which was then inserted into the 5 mm OD quartz NMR tube containing the solutions under investigation. NMR spectra were further processed with the freely available Spinworks (version 1.3.8.1) software (Dr. Kirk Marat, University of Manitoba, Canada).

### Mössbauer spectroscopy

Mössbauer spectra were recorded on spectrometers from WEB Research (Edina, MN). The spectrometer used to acquire the weak-field spectra is equipped with a Janis SVT-400 variable-temperature cryostat. The spectrometer used to acquire the strong-field spectra is equipped with a Janis 8TMOSS-OM-12SVT variable-temperature cryostat. The external magnetic field was applied parallel to the  $\gamma$ -beam. All isomer shifts quoted are relative to the centroid of the spectrum of  $\alpha$ -iron metal at room temperature. Simulation of the Mössbauer spectra was carried out by using the WMOSS spectral analysis software ([www.wmoss.org](http://www.wmoss.org), WEB Research, Edina, MN). The high-field simulations were carried out using the spin-Hamiltonian (6), in which all symbols have their usual meaning.

$$H = \mu_B \mathbf{S} \cdot \mathbf{g} \cdot \mathbf{B} + D \left( \mathbf{S}_z^2 - \frac{S(S+1)}{3} \right) + E (\mathbf{S}_x^2 - \mathbf{S}_y^2) + \sum_{i=1}^2 \frac{eQV_{zz,i}}{4} \left[ \mathbf{I}_{z,i}^2 - \frac{I_i(I_i+1)}{3} + \frac{\eta}{3} (\mathbf{I}_{x,i}^2 - \mathbf{I}_{y,i}^2) \right] + \sum_{i=1}^2 \mathbf{S} \cdot \mathbf{A}_i \cdot \mathbf{I}_i - \sum_{i=1}^2 g_n \mu_n \mathbf{B} \cdot \mathbf{I}_i$$

The first term corresponds to the electronic Zeeman interaction, the second and third correspond to the axial and rhombic zero field splitting, the fourth term describes the interaction between the electric field gradient and the nuclear quadrupole moment, the fifth term corresponds to the hyperfine interactions between the electronic spin and the  $^{57}\text{Fe}$  nucleus, and the sixth term represents the nuclear Zeeman interaction. The simulations were carried out with respect to the total spin of the cluster.

### EPR spectroscopy

EPR spectra were acquired on a Bruker ESP300 CW X-Band spectrometer (operating at approx. 9.48 GHz) equipped with a rectangular cavity ( $\text{TE}_{102}$ ) and a continuous-flow cryostat (Oxford 910) with a temperature controller (Oxford ITC 503).

## General crystallographic methods

Preliminary screening of protein crystals was performed at the X-ray crystallography facility in the Huck Institutes for the Life Sciences. Diffraction datasets for structure solution were collected at the Life Sciences Collaborative Access Team (LS-CAT) beamlines at the Advanced Photon Source. All datasets were indexed, integrated, and scaled using the HKL 2000 software package (7). Model building was accomplished in Coot (8), and refinement was carried out in PHENIX (9). All data collection and refinement statistics are reported in Table S1. Structure validation was performed with Molprobity. Figures were generated with the PyMOL Molecular Graphics System (Schrödinger, LLC), and electron density maps were calculated with PHENIX (9).

## Determination of the structure of citrate-bound PhnZ

N-terminally His<sub>6</sub>-tagged PhnZ overexpressed from pRSET\_ *phnZ* was prepared for crystallographic analysis as described in the protein production and purification section. An additional size-exclusion chromatography step (Sephacryl-200 gel filtration column, GE Healthcare) was included using 50 mM MOPS pH 7.5, 10% (v/v) glycerol as running buffer. Hexagonal prism-shaped crystals of PhnZ (12 mg/mL) appeared after one week of incubation at room temperature using the sitting drop vapor diffusion method with 0.1 M HEPES pH 7.5, 1.4 M trisodium citrate as the precipitant. Crystals were mounted on rayon loops for data collection and flash-frozen by direct plunge into liquid nitrogen with no further cryoprotection. The structure was solved by single-wavelength anomalous diffraction (SAD) phasing using a dataset collected at the Fe X-ray absorption peak. The phases were determined with autoSHARP (10) using the two active site Fe ions (Table S1). From the resulting electron density maps, an initial model was generated with Buccaneer (11). An additional high-resolution native dataset was used to generate and refine the final model. The final model consists of PhnZ residues 1-66, residues 72-187, two Fe ions, one citrate anion, one bridging hydroxo group and 153 water molecules. No electron density is observed for the N-terminal affinity tag and for a surface loop (residues 66-72) near the active site. The occupancies of two metal ions were refined with PHENIX and both sites are modeled at nearly full (92%) occupancy. Ramachandran plots show that 100% of the residues are in allowed and additionally allowed regions.

## Determination of the structure of OH-AEP-bound PhnZ

The *phnZ* gene was PCR amplified from the pRSET\_ *phnZ* plasmid and subcloned into a pET26b vector using *NdeI* and *XhoI* restriction sites resulting in the plasmid pET26b\_ *phnZ*

encoding the *phnZ* gene with a C-terminal His<sub>6</sub>-tag. This protein was overexpressed in *E. coli* BL21 cells that had been transformed with pET26b\_*phnZ*. Cultures were grown at 30 °C in enriched LB medium supplemented with kanamycin (0.05 mg/mL) to an OD<sub>600</sub> of 0.7, followed by IPTG induction (0.1 mM) for 16 hours at 30 °C. The protein was purified and prepared for crystallization trials as described for the N-terminally tagged protein overexpressed from pRSET\_*phnZ*.

Crystals of C-terminally His<sub>6</sub>-tagged PhnZ with bound (*R*)-OH-AEP were prepared from a solution containing both the enzyme (14 mg/mL) and the substrate (8 molar equiv.) that was preincubated for 20 minutes on ice prior to setup of the crystallization trials. Plate-like crystals grew overnight in sitting drop vapor diffusion trays with 0.1 M sodium acetate pH 4.6, 0.2 M ammonium sulfate, and 25% (w/v) PEG 4000 as the precipitant. Crystals were mounted on rayon loops for data collection and incrementally transferred (5% increase in glycerol) into a final cryoprotection solution of 0.1 M sodium acetate pH 4.6, 0.2 M ammonium sulfate, 25% (w/v) PEG 4000 and 25% (v/v) glycerol.

The structure was solved by molecular replacement using PHASER (12) with the citrate-bound PhnZ structure as the search model. Four substrate-bound PhnZ molecules are present in the asymmetric unit. The coordinates for (*R*)-OH-AEP were generated using the PRODRG server (13). The final model consists of residues 4-65 and residues 70-187 in chains A, B, and E; residues 4-64 and residues 70-187 in chain D; eight Fe ions; and four (*R*)-OH-AEP molecules. No electron density was observed in any of the four PhnZ molecules for residues 1-3, residues 66-69, or the C-terminal His<sub>6</sub> tag. The occupancies of the substrate atoms and metal ions were refined in PHENIX and are modeled at 100% occupancy in the final model. Ramachandran plots show that 99.8% of the residues are in allowed and additionally regions.

### **Phylogenetic analysis**

The Basic Local Alignment Search Tool (BLAST) was used to perform similarity searches through the NCBI BLAST webpage interface (<http://www.ncbi.nlm.nih.gov/BLAST/>) (14). The retrieved sequences were initially grouped on the basis of similarity relationships and the genomic contexts of their encoding genes. The sequences were further culled by requiring that each contain at least the six conserved residues necessary for coordinating a dinuclear cluster (i.e. four histidines and two glutamates). Each selected sequence was examined for completeness and length. Approximately 8 sequences from each group were chosen, so as to have equal representations from each group within the phylogenetic tree and avoid bias. The amino acid sequences of each group were aligned using the MAFFT (version is 7.03,



<http://mafft.cbrc.jp/alignment/software/>) online webserver (15) and the ClustalW algorithm as implemented in the MEGA 5.2 software (16, 17). For the construction of the tree, all sequences were further re-aligned together. Neighbor joining (NJ) (18), minimum evolution and maximum likelihood (19) trees were constructed using the respective algorithms in the MEGA software package and the MAFFT online server as well as the older software ClustalX2 (20). Similar trees were obtained with the different methods. The robustness of the trees was further confirmed by using the bootstrap method with 1000 replications.

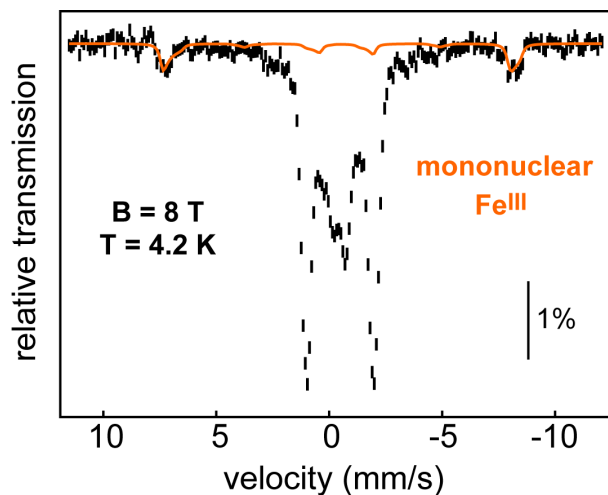

**Figure S1.** 4.2-K Mössbauer spectrum of the aerobically isolated PhnZ recorded in a wide range ( $\sim \pm 12$  mm/s) of Doppler velocities. An external magnetic field of 8 T applied parallel to the  $\gamma$ -beam. The orange solid line represents a simulation of the mononuclear high-spin  $\text{Fe}^{\text{III}}$  contaminant(s). Its integrated intensity corresponds to 7% of the total Fe species in the sample. The simulation was carried out using the spin-Hamiltonian formalism with the following parameters:  $S = 5/2$ ,  $D = -1.0 \text{ cm}^{-1}$ ,  $E/D = 0.33$ ,  $g = 2.0$ ,  $\delta = 0.55 \text{ mm/s}$ ,  $\Delta E_Q = -1 \text{ mm/s}$ ,  $\eta = -2.5$ ,  $A_{\text{iso}}/(g_N \beta_N) = -22.2 \text{ T}$ .

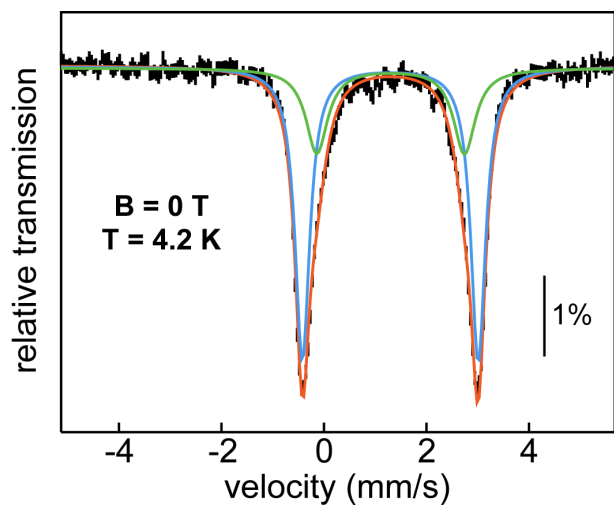

**Figure S2.** 4.2-K/0-T Mössbauer spectrum of the dithionite-reduced form of PhnZ. The experimental spectrum (black vertical bars) is fit by two sets of quadrupole doublets with parameters  $\delta_1 = 1.30 \text{ mm/s}$ ,  $\Delta E_{Q1} = 3.43 \text{ mm/s}$  (blue solid line),  $\delta_2 = 1.3 \text{ mm/s}$  and  $\Delta E_{Q2} = 2.83 \text{ mm/s}$  (green solid line) and a Lorentzian line shape. The overall fit (summation) is shown as a red solid line.

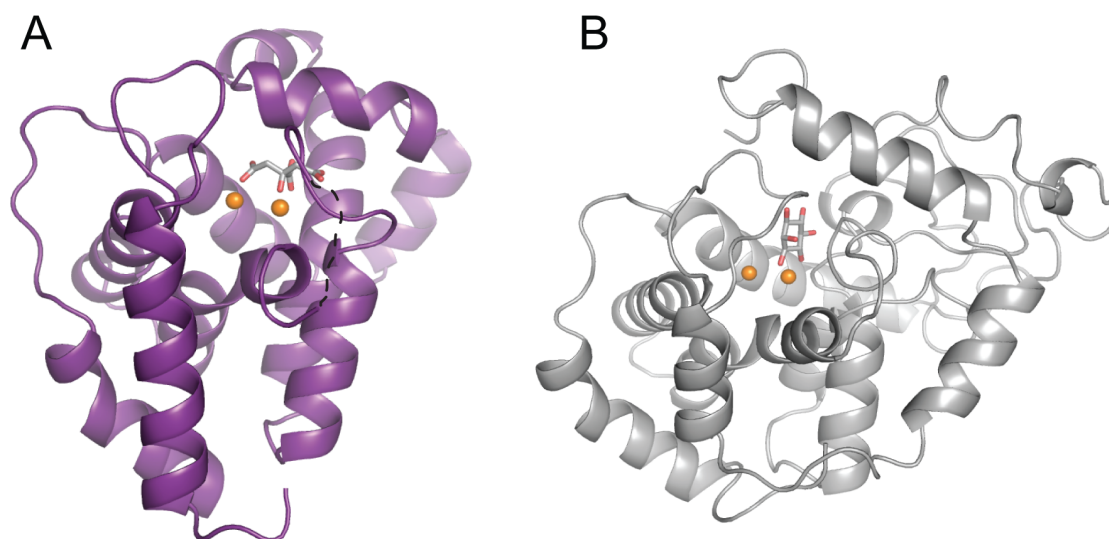

**Figure S3.** Comparison of the overall structures of citrate-bound PhnZ (A) and *M. musculus* MIOX (PDB accession code 2HUO) (B). A disordered region in PhnZ is represented by a black dashed line. The Fe ions in both structures are shown as orange spheres, and the substrate and citrate molecules are shown in stick format.

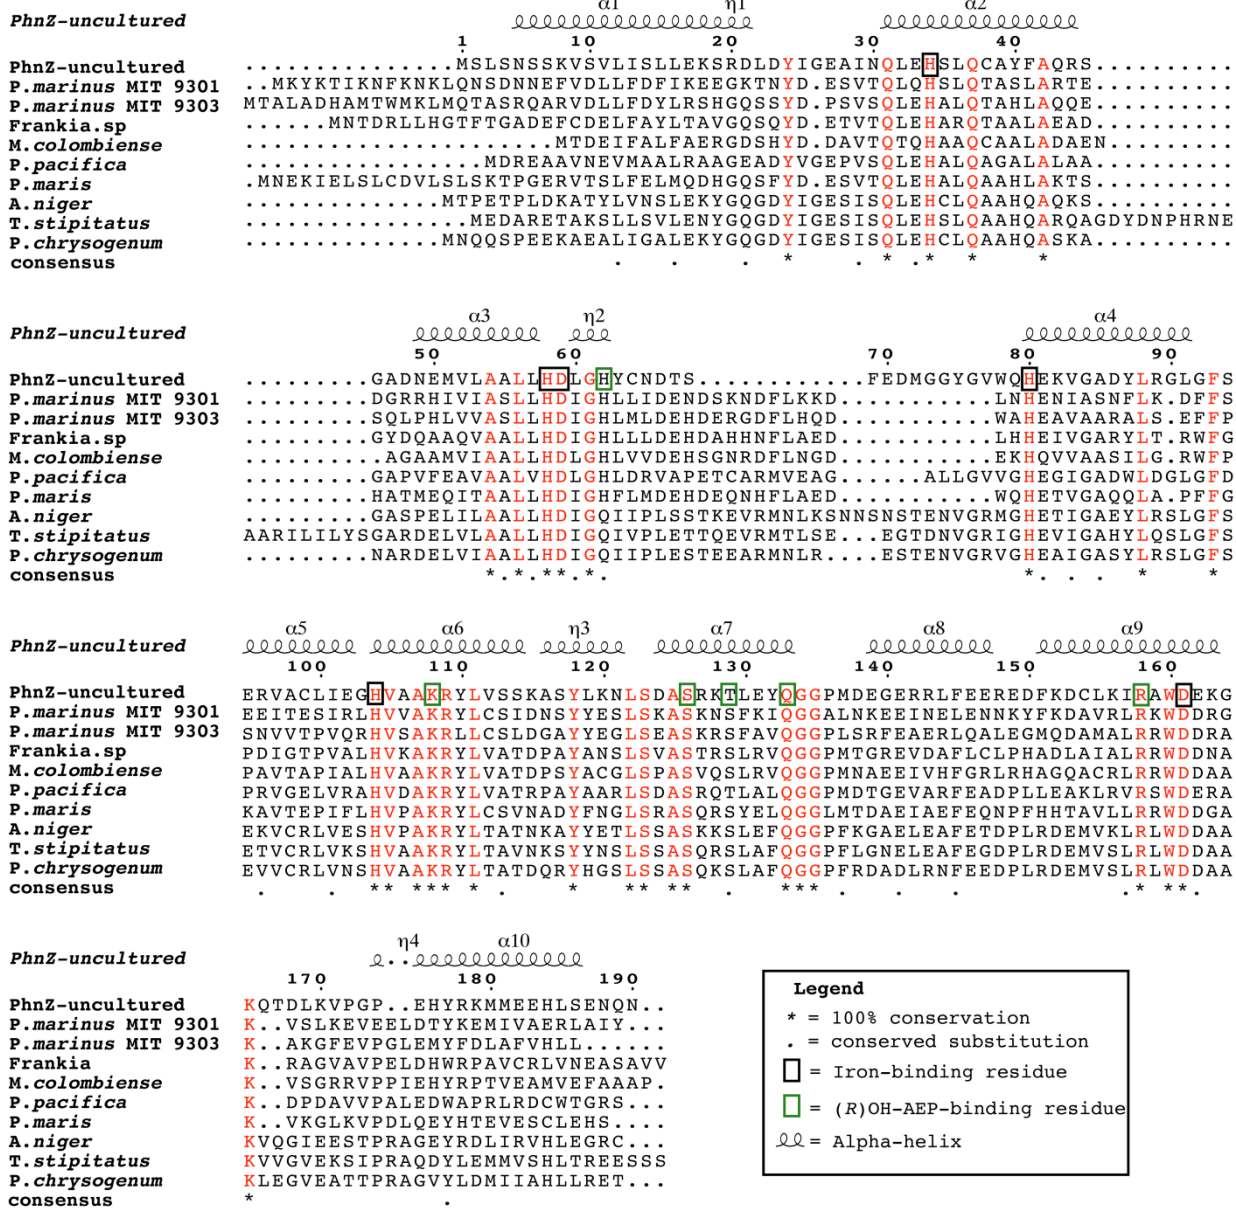

Figure S4. Multiple sequence alignment of PhnZ-like sequences.

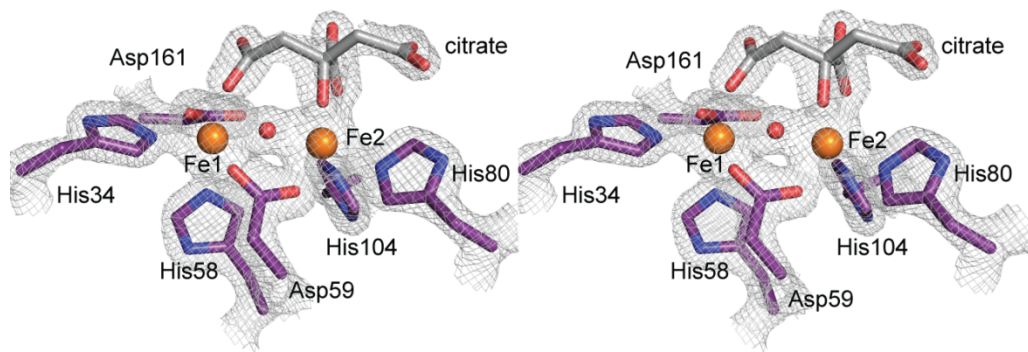

**Figure S5.** Stereoview of the  $2F_o - F_c$  electron density map (gray mesh contoured at  $2.0\sigma$ ) for the diiron site and bound citrate molecule in the high-resolution PhnZ X-ray structure. The Fe ions are shown as orange spheres and the bridging oxygen species is shown as a red sphere. The side chains of the coordinating residues are shown in stick format and colored by atom type.

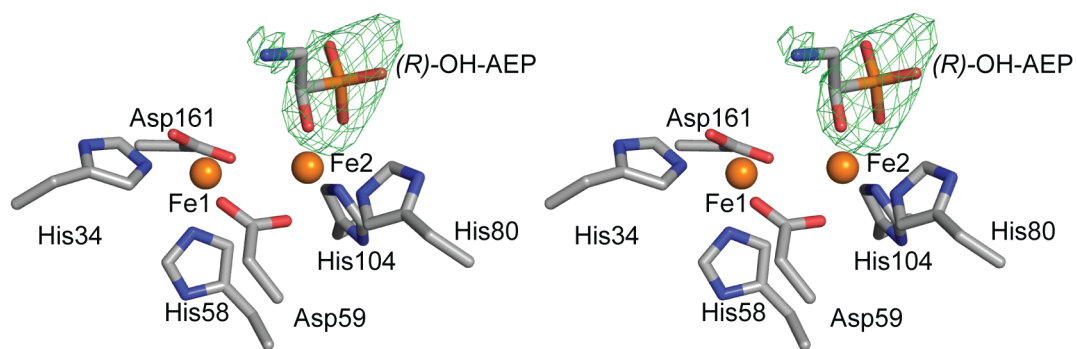

**Figure S6.** Stereoview of an omit map (green mesh contoured at  $3.0\sigma$ ) showing the electron density for the substrate molecule in chain A of the substrate-bound PhnZ structure. The Fe ions are shown as orange spheres and the side chains of the coordinating residues are shown in stick format and colored by atom type. The substrate molecule was modeled at 100% occupancy in all monomers with minor differences in the orientation of the amino group.

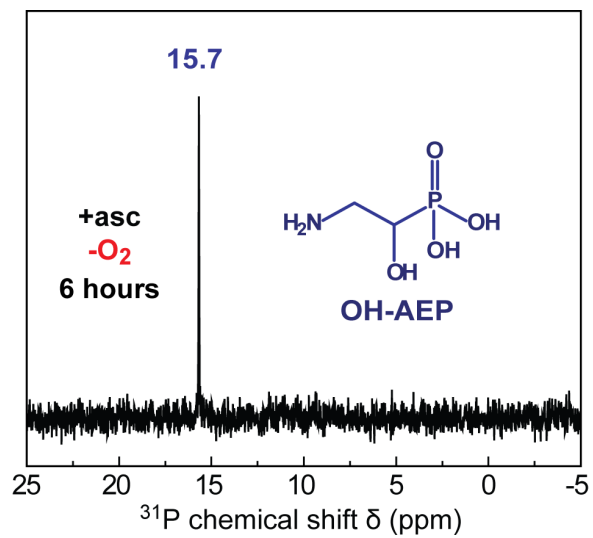

**Figure S7.**  $^{31}\text{P}$ -NMR spectrum of a sample containing 10  $\mu\text{M}$  PhnZ, 2 mM OH-AEP and 5 equiv. of L-ascorbate that was incubated in the anoxic chamber for 6 hours at ambient temperature. The absence of phosphate product establishes that O<sub>2</sub> is required for the PhnZ reaction.



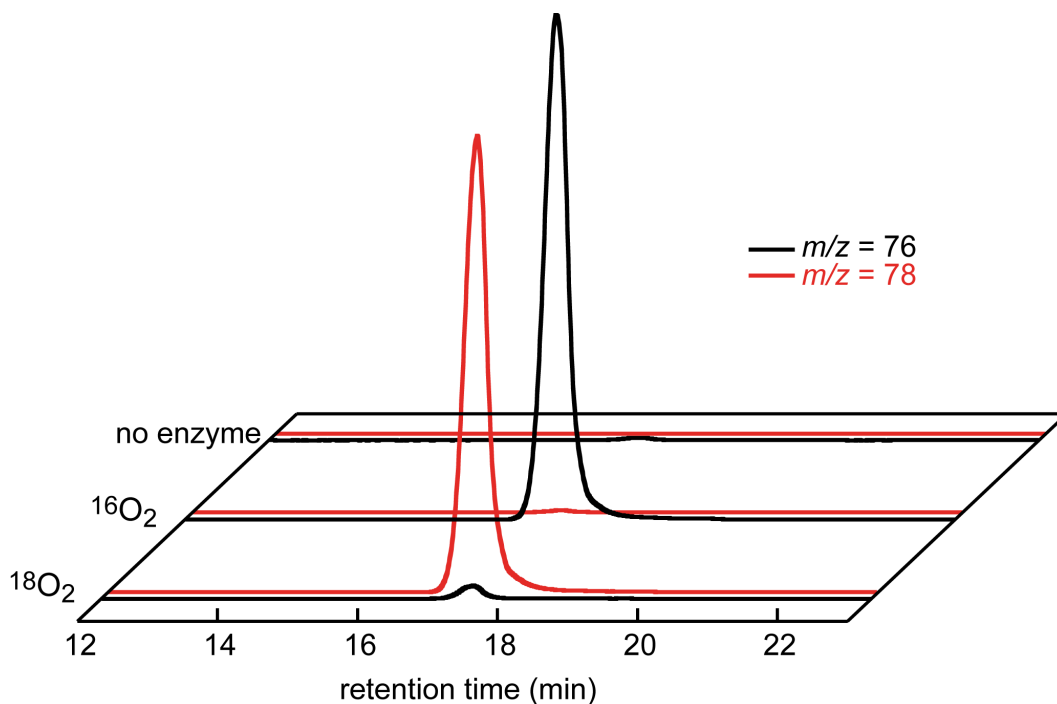

**Figure S8.** Incorporation of an O-atom from  $O_2$  into glycine demonstrated by LC-MS single-ion-monitoring (SIM) chromatograms of PhnZ reactions in the presence of  $^{16}O_2$  and  $^{18}O_2$  and of a no enzyme control. SIM chromatograms for  $m/z = 76$ , corresponding to  $^{16}O$ -glycine ( $H_3N-CH_2-C^{16}O^{16}OH)^{1+}$ , are shown in black, and those for  $m/z = 78$ , corresponding to  $^{18}O$ -glycine ( $H_3N-CH_2-C^{16}O^{18}OH)^{1+}$  are shown in red. The nearly complete (98%) incorporation of  $^{18}O$  from  $^{18}O_2$  into the glycine product establishes that PhnZ is an oxygenase.

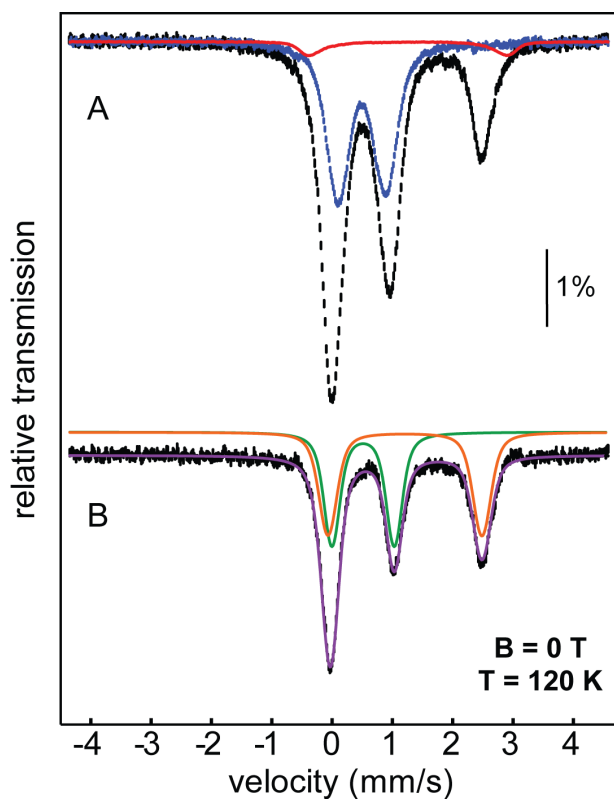

**Figure S9.** 120-K/0-T Mössbauer spectra of PhnZ. (A) Spectrum of the aerobically isolated PhnZ following treatment in the absence of O<sub>2</sub> with excess L-ascorbate, which was then removed using a PD-10 desalting column (black). The spectrum contains an upper limit of 4% of the Fe<sup>II</sup>/Fe<sup>II</sup> state (red) and approximately 46% of the Fe<sup>III</sup>/Fe<sup>III</sup> form (blue). Subtraction of these contributions yields the reference spectrum of the mixed-valent Fe<sup>II</sup>/Fe<sup>III</sup> form (B; black). The individual contributions of the Fe<sup>III</sup> site ( $\delta = 0.51$  mm/s,  $\Delta E_Q = 1.03$  mm/s) and the Fe<sup>II</sup> site ( $\delta = 1.20$  mm/s,  $\Delta E_Q = 2.55$  mm/s) are shown in green and orange, respectively. The summation of these contributions is shown in purple.

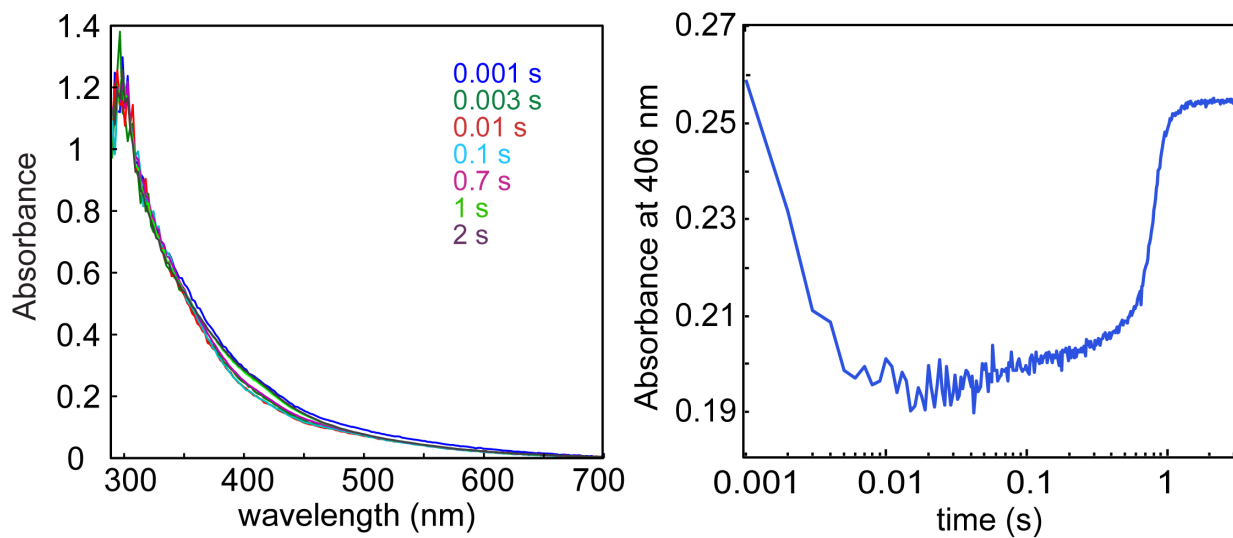

**Figure S10.** Reaction of PhnZ-Fe<sup>II</sup>/Fe<sup>III</sup>•OH-AEP with O<sub>2</sub> at 5 °C monitored by stopped-flow absorption spectroscopy. (Left) Absorption spectra at the reaction times shown in the figure. (Right) Kinetics of the absorbance at 406 nm. Concentrations after mixing were 0.07 mM PhnZ-Fe<sup>II</sup>/Fe<sup>III</sup>, 1.5 mM OH-AEP, and ~ 0.9 mM O<sub>2</sub> in 50 mM MOPS buffer pH 7.5.

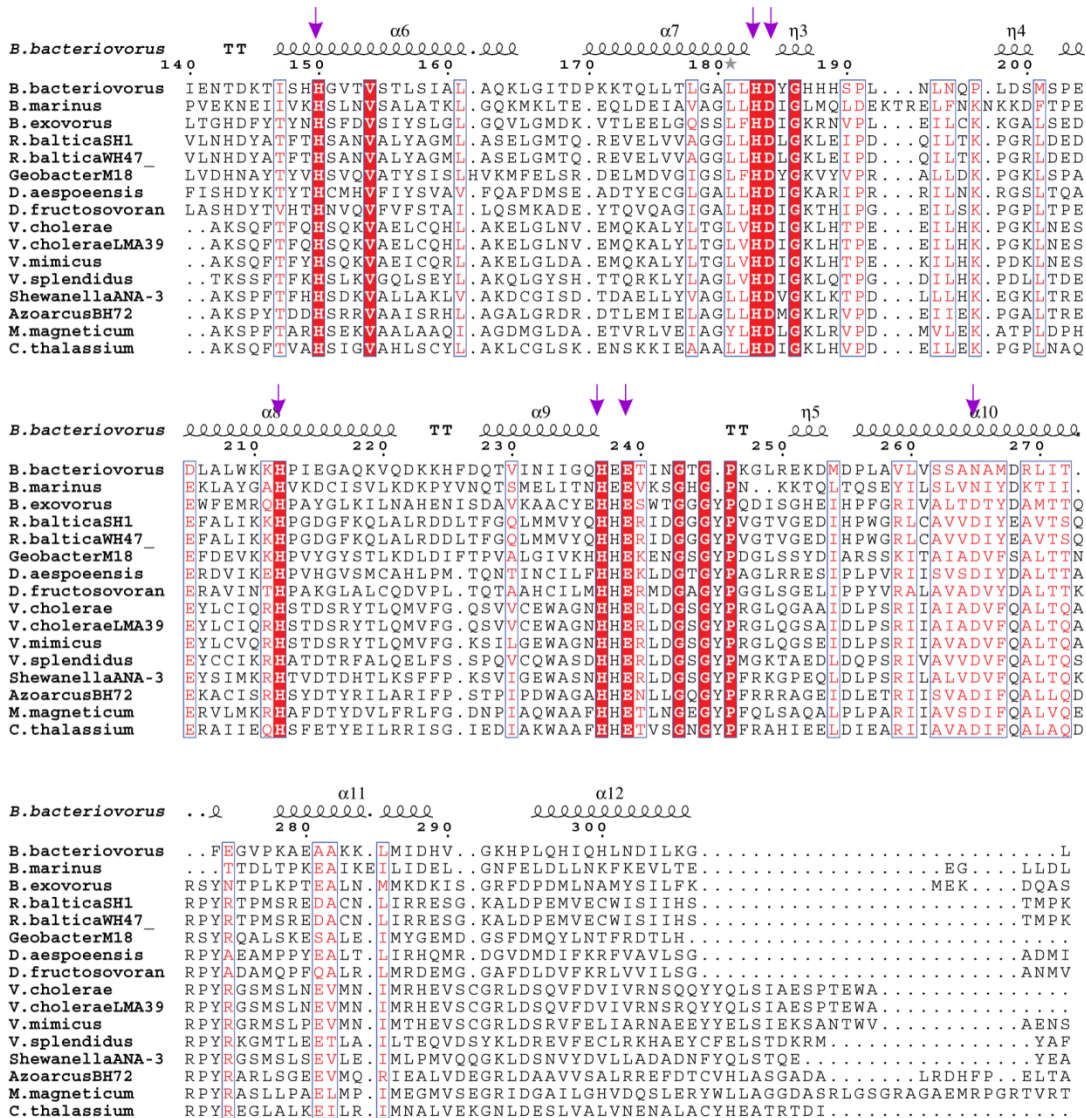

**Figure S11.** Multiple sequence alignment of the proteins in the HD-GYP and HD-[HD-GYP] clades starting from residue 140. Residues that coordinate the metal ions are indicated with purple arrows.

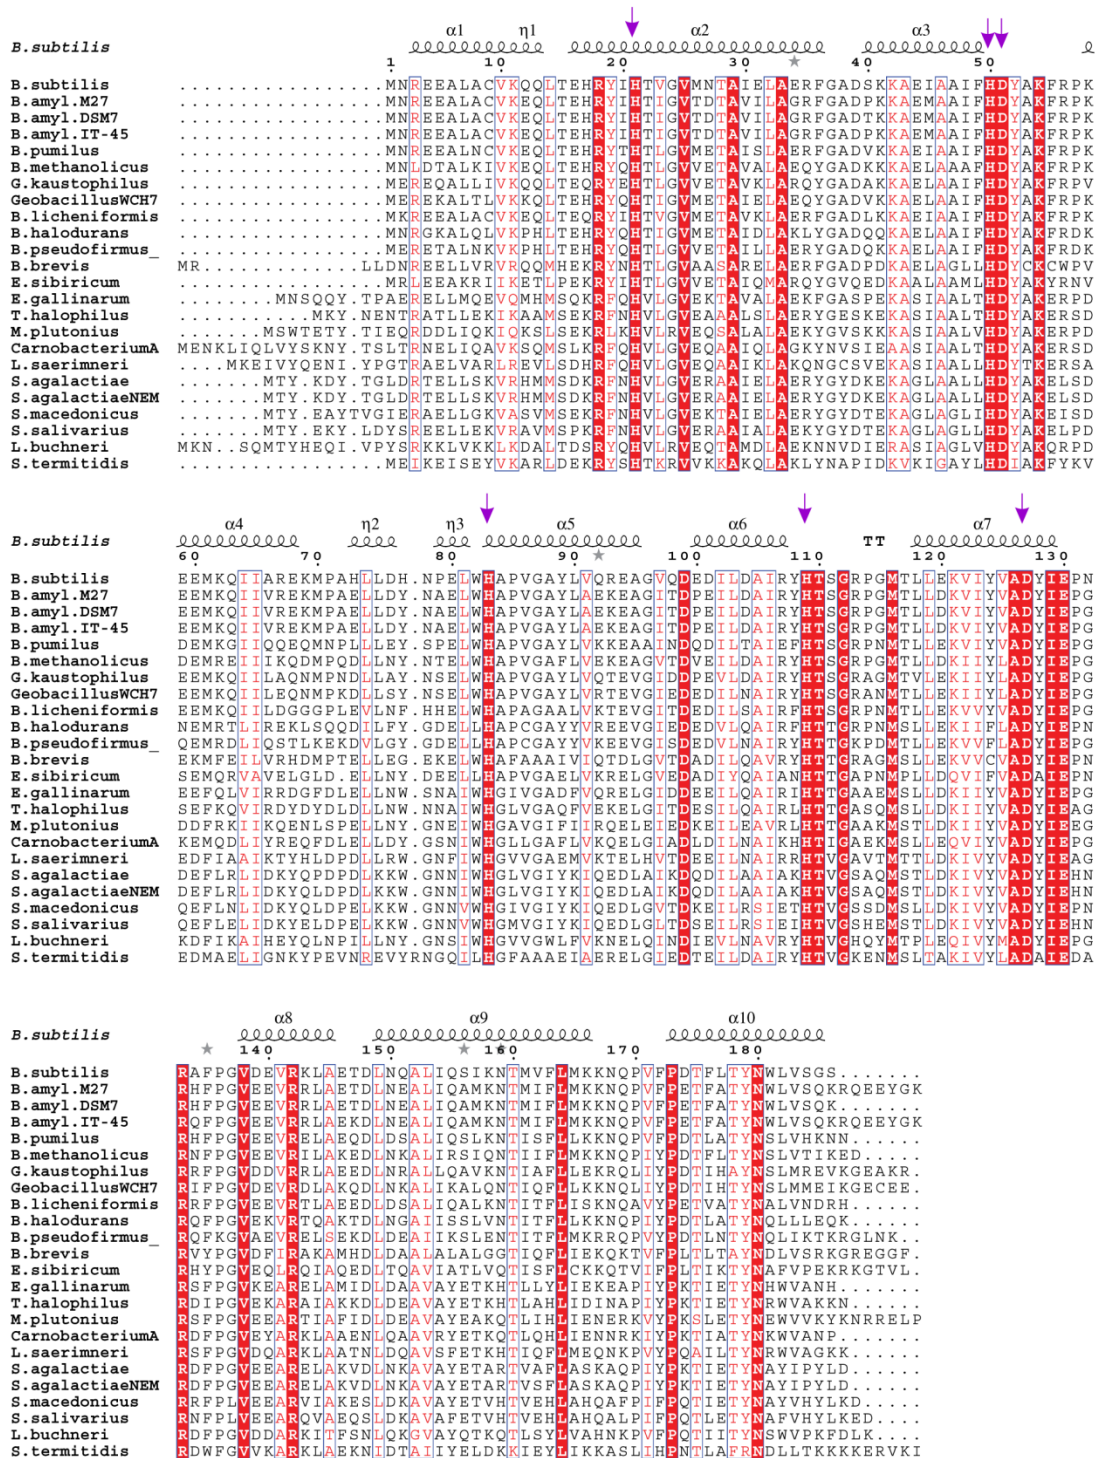



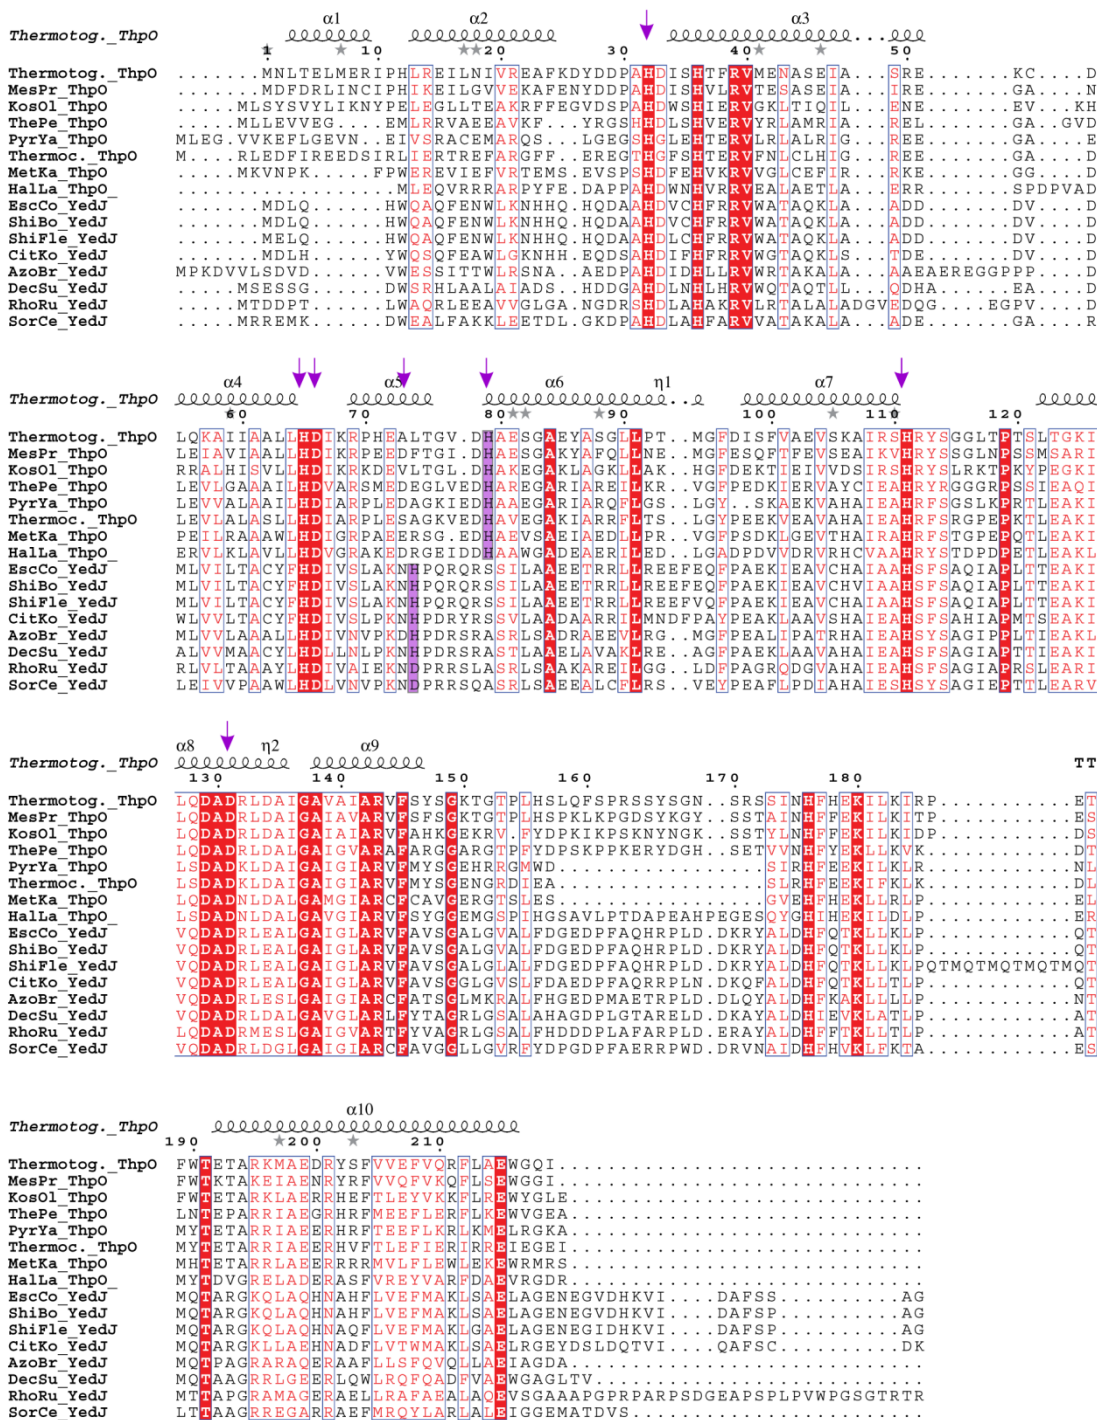

**Figure S13.** Multiple sequence alignment of the proteins in the ThpO and YedJ clades. Residues that coordinate the metal ions are indicated with purple arrows. Purple shaded boxes indicate the 5<sup>th</sup> His ligands in ThpO and YedJ respectively.

**Table S1.** Data collection and refinement statistics for the citrate-bound and substrate-bound (OH-AEP) PhnZ X-ray crystal structures.

|                                        | PhnZ-citrate               | PhnZ-citrate (ano)         | PhnZ-substrate          |
|----------------------------------------|----------------------------|----------------------------|-------------------------|
| <b>Data collection</b>                 |                            |                            |                         |
| Wavelength (Å)                         | 0.98                       | 1.72                       | 0.98                    |
| Space group                            | <i>P</i> 3 <sub>1</sub> 21 | <i>P</i> 3 <sub>1</sub> 21 | <i>C</i> 2              |
| Unit cell dimensions                   |                            |                            |                         |
| <i>a</i> , <i>b</i> , <i>c</i> (Å)     | 68.18, 68.18, 98.09        | 67.97, 67.97, 98.30        | 148.75, 165.42, 109.35  |
| Resolution (Å)                         | 50.00-1.85 (1.88-1.85)*    | 50.00-2.92 (2.97-2.92)*    | 30.00-2.98 (3.05-2.98)* |
| R <sub>sym</sub> or R <sub>merge</sub> | 0.063 (0.817)              | 0.343 (0.163)              | 0.126 (0.372)           |
| <i>I</i> / $\sigma$ ( <i>I</i> )       | 49.6 (3.1)                 | 16.4 (36.2)                | 13.06 (4.16)            |
| Completeness (%)                       | 99.94 (99.40)              | 100 (100)                  | 93.5 (96.9)             |
| Redundancy                             | 10.8 (9.8)                 | 20.7 (20.1)                | 5.9 (5.6)               |
| <b>Refinement</b>                      |                            |                            |                         |
| Resolution range (Å)                   | 50.00-1.85                 |                            | 30.00-2.98              |
| No. unique reflections                 | 23752                      |                            | 16580                   |
| R <sub>work</sub> / R <sub>free</sub>  | 0.1875/0.2118              |                            | 0.278/0.333             |
| No. atoms                              | 1593                       |                            | 5767                    |
| Protein                                | 1434                       |                            | 5727                    |
| Ligand/ions                            | 14                         |                            | 40                      |
| Water                                  | 154                        |                            | N/A                     |
| Avg. <i>B</i> -factor                  |                            |                            |                         |
| Protein                                | 34.20                      |                            | 67.40                   |
| Ligand/ions                            | 26.70                      |                            | 52.80                   |
| Water                                  | 43.20                      |                            | N/A                     |
| r.m.s deviations                       |                            |                            |                         |
| Bond lengths (Å)                       | 0.006                      |                            | 0.008                   |
| Bond angles (°)                        | 0.94                       |                            | 0.452                   |

\*Values in parentheses report statistics for the highest-resolution shell

**Table S2.** Proteins used for the phylogenetic analysis.

| Accession code | NCBI Annotation                                                           | Organism                                                     |
|----------------|---------------------------------------------------------------------------|--------------------------------------------------------------|
| ACU83550.1     | predicted HD phosphohydrolase PhnZ                                        | uncultured bacterium HF130_AEPn_1                            |
| YP_001091480.1 | hypothetical protein P9301_12561                                          | <i>Prochlorococcus marinus</i> str. MIT 9301                 |
| YP_001017139.1 | hypothetical protein P9303_11251                                          | <i>Prochlorococcus marinus</i> str. MIT 9303                 |
| YP_481098.1    | hypothetical protein Francci3_1995                                        | <i>Frankia</i> sp. Ccl3                                      |
| ZP_08717929.1  | hypothetical protein MCOL_20456                                           | <i>Mycobacterium colombiense</i> CECT 3035                   |
| ZP_01905457.1  | HDIG domain protein                                                       | <i>Plesiocystis pacifica</i> SIR-1                           |
| ZP_01854986.1  | hypothetical protein PM8797T_07614                                        | <i>Planctomyces maris</i> DSM 8797                           |
| XP_001399948.1 | hypothetical protein ANI_1_2760024                                        | <i>Aspergillus niger</i> CBS 513.88                          |
| XP_002479453.1 | conserved hypothetical protein                                            | <i>Talaromyces stipitatus</i> ATCC 10500                     |
| XP_002565218.1 | hypothetical protein Pc22g12750                                           | <i>Penicillium chrysogenum</i> Wisconsin 54-1255             |
| YP_006563750.1 | metal-dependent phosphohydrolases-like protein                            | <i>Phaeobacter gallaeciensis</i> 2.10                        |
| ZP_05080776.1  | conserved hypothetical protein                                            | <i>Rhodobacterales bacterium</i> Y41                         |
| ZP_05786163.1  | conserved hypothetical protein                                            | <i>Silicibacter lacuscaerulensis</i> ITI-1157                |
| ZP_05087911.1  | conserved hypothetical protein                                            | <i>Ruegeria</i> sp. R11                                      |
| YP_004014535.1 | phosphonate degradation operons associated HDIG domain-containing protein | <i>Frankia</i> sp. Eul1c                                     |
| YP_004142411.1 | hypothetical protein                                                      | <i>Mesorhizobium ciceri</i> biovar <i>biserrulae</i> WSM1271 |
| ZP_01074753.1  | hypothetical protein MED121_17544                                         | <i>Marinomonas</i> sp. MED121                                |
| ZP_01754854.1  | hypothetical protein RSK20926_22209                                       | <i>Roseobacter</i> sp. SK209-2-6                             |
| ZP_10649542.1  | phosphonate degradation operons associated HDIG domain protein            | <i>Pseudomonas</i> sp. GM50                                  |
| ZP_11114572.1  | phosphonate degradation operons associated HDIG domain protein            | <i>Pseudomonas mandelii</i> JR-1                             |
| YP_007032156.1 | metal-dependent phosphohydrolase                                          | <i>Pseudomonas</i> sp. UW4                                   |
| ZP_18348829.1  | phosphonate degradation operons associated HDIG domain protein            | <i>Pseudomonas fluorescens</i> R124                          |
| YP_262944.1    | phosphonate degradation operons associated HDIG domain protein            | <i>Pseudomonas protegens</i> Pf-5                            |
| ZP_10174257.1  | phosphonate degradation operons associated HDIG domain protein            | <i>Pseudomonas chlororaphis</i> O6                           |
| ZP_10142158.1  | phosphonate degradation operons associated HDIG domain protein            | <i>Pseudomonas synxantha</i> BG33R                           |
| AAV65817.1     | <i>myo</i> -inositol oxygenase                                            | <i>Rattus norvegicus</i>                                     |
| XP_003509608.1 | PREDICTED: inositol oxygenase-like                                        | <i>Cricetulus griseus</i>                                    |
| AAF25204.1     | <i>myo</i> -inositol oxygenase                                            | <i>Homo sapiens</i>                                          |
| NP_001124754.1 | inositol oxygenase                                                        | <i>Pongo abelii</i>                                          |
| XP_003281515.1 | PREDICTED: inositol oxygenase-like                                        | <i>Nomascus leucogenys</i>                                   |
| XP_003461613.1 | PREDICTED: inositol oxygenase-like                                        | <i>Cavia porcellus</i>                                       |
| XP_001490312.3 | PREDICTED: inositol oxygenase-like                                        | <i>Equus caballus</i> (horse)                                |
| AAK00766.1     | kidney-specific protein 32                                                | <i>Homo sapiens</i>                                          |
| CAJ75704.1     | predicted HD superfamily hydrolase                                        | uncultured <i>Thermotogales</i> bacterium                    |
| AFK07215.1     | putative domain HDIG-containing protein                                   | <i>Mesotoga prima</i> MesG1.Ag.4.2                           |
| YP_002940461.1 | metal-dependent phosphohydrolase                                          | <i>Kosmotoga olearia</i> TBF 19.5.1                          |
| YP_920563.1    | metal-dependent phosphohydrolase                                          | <i>Thermofilum pendens</i> Hrk 5                             |
| NP_614753.1    | HD superfamily hydrolase                                                  | <i>Methanopyrus kandleri</i> AV19                            |
| YP_004624251.1 | metal-dependent phosphohydrolase, HD superfamily                          | <i>Pyrococcus yayanosii</i> CH1                              |
| YP_006424365.1 | hypothetical protein containing HD domain 1                               | <i>Thermococcus</i> sp. CL1                                  |
| ZP_09946302.1  | metal-dependent phosphohydrolase                                          | <i>Halobiforma lacisalsi</i> AJ5                             |
| NP_416471.1    | predicted hydrolase, HD superfamily                                       | <i>Escherichia coli</i> str. K-12 substr. MG1655             |
| YP_407527.1    | hypothetical protein SBO_1046                                             | <i>Shigella boydii</i> Sb227                                 |
| EGM61578.1     | HD domain protein                                                         | <i>Shigella flexneri</i> J1713                               |
| YP_001452563.1 | hypothetical protein CKO_00980                                            | <i>Citrobacter koseri</i> ATCC BAA-895                       |
| CCD01718.1     | putative metal-dependent phosphohydrolase                                 | <i>Azospirillum brasilense</i> Sp245                         |
| YP_005029269.1 | unnamed protein product                                                   | <i>Dechlorosoma suillum</i> PS                               |



|                |                                              |                                                               |
|----------------|----------------------------------------------|---------------------------------------------------------------|
| YP_001615272.1 | unnamed protein product                      | <i>Sorangium cellulosum</i> 'So ce 56'                        |
| YP_427146.1    | metal-dependent phosphohydrolase, HD region  | <i>Rhodospirillum rubrum</i> ATCC 11170                       |
| P54456.1       | Uncharacterized protein yqeK                 | <i>Bacillus subtilis</i> subsp. <i>subtilis</i> str. 168      |
| YP_148374.1    | hypothetical protein GK2521                  | <i>Geobacillus kaustophilus</i> HTA426                        |
| YP_079904.1    | hypothetical protein BL02082                 | <i>Bacillus licheniformis</i> ATCC 14580                      |
| YP_001487526.1 | <i>yqeK</i> gene product                     | <i>Bacillus pumilus</i> SAFR-032                              |
| YP_002771473.1 | hypothetical protein BBR47_19920             | <i>Brevibacillus brevis</i> NBRC 100599                       |
| YP_001813266.1 | metal-dependent phosphohydrolase             | <i>Exiguobacterium sibiricum</i> 255-15                       |
| ZP_05648832.1  | HD domain-containing protein                 | <i>Enterococcus gallinarum</i> EG2                            |
| ZP_03943580.1  | HD superfamily hydrolase                     | <i>Lactobacillus buchneri</i> ATCC 11577                      |
| NP_242193.1    | hypothetical protein BH1327                  | <i>Bacillus halodurans</i> C-125                              |
| YP_003427593.1 | hypothetical protein BpOF4_13250             | <i>Bacillus pseudofirmus</i> OF4                              |
| YP_002950417.1 | metal-dependent phosphohydrolase             | <i>Geobacillus</i> sp. WCH70                                  |
| ZP_11547518.1  | YqeK                                         | <i>Bacillus methanolicus</i> MGA3                             |
| ZP_16170044.1  | 2',3'-cyclic-nucleotide 2'-phosphodiesterase | <i>Bacillus amyloliquefaciens</i> subsp. <i>plantarum</i> M27 |
| ZP_17179708.1  | YqeK                                         | <i>Bacillus amyloliquefaciens</i> IT-45                       |
| YP_003921057.1 | hydrolase                                    | <i>Bacillus amyloliquefaciens</i> DSM 7                       |
| YP_003307575.1 | kidney-specific protein 32                   | <i>Sebaldella termitidis</i> ATCC 33386                       |
| NP_688652.1    | hypothetical protein SAG1661                 | <i>Streptococcus agalactiae</i> 2603V/R                       |
| NP_736140.1    | hypothetical protein gbs1705                 | <i>Streptococcus agalactiae</i> NEM316                        |
| YP_005095370.1 | hydrolase                                    | <i>Streptococcus macedonicus</i> ACA-DC 198                   |
| ZP_12658042.1  | putative HD superfamily hydrolase            | <i>Streptococcus salivarius</i> M18                           |
| YP_004886756.1 | hypothetical protein TEH_12650               | <i>Tetragenococcus halophilus</i> NBRC 12172                  |
| ZP_19196683.1  | hypothetical protein D271_06905              | <i>Lactobacillus saerimneri</i> 30a                           |
| YP_004455861.1 | HAD superfamily hydrolase                    | <i>Melissococcus plutonius</i> ATCC 35311                     |
| ZP_02184981.1  | HD domain protein                            | <i>Carnobacterium</i> sp. AT7                                 |
| NP_968683.1    | hypothetical protein Bd1817                  | <i>Bdellovibrio bacteriovorus</i> HD100                       |
| YP_005036194.1 | unnamed protein product                      | <i>Bacteriovorax marinus</i> SJ                               |
| YP_007644848.1 | HD-GYP hydrolase domain-containing protein   | <i>Bdellovibrio exovorus</i> JSS                              |
| YP_004196908.1 | metal-dependent phosphohydrolase             | <i>Geobacter</i> sp. M18                                      |
| YP_004119802.1 | metal-dependent phosphohydrolase             | <i>Desulfovibrio aespoensis</i> Aspo-2                        |
| ZP_07334137.1  | metal-dependent phosphohydrolase             | <i>Desulfovibrio fructosovorans</i> JJ                        |
| NP_864187.1    | response regulator                           | <i>Rhodopirellula baltica</i> SH 1                            |
| EGF24277.1     | HD-GYP domain-containing protein             | <i>Rhodopirellula baltica</i> WH47                            |
| NP_233069.1    | hypothetical protein VCA0681                 | <i>Vibrio cholerae</i> O1 biovar El Tor str. N16961           |
| YP_005632344.1 | HDIG domain-containing protein               | <i>Vibrio cholerae</i> LMA3984-4                              |
| YP_002395757.1 | hypothetical protein VS_II1179               | <i>Vibrio splendidus</i> LGP32                                |
| WP_005508357.1 | hypothetical protein                         | <i>Vibrio mimicus</i>                                         |
| YP_868720.1    | metal-dependent phosphohydrolase             | <i>Shewanella</i> sp. ANA-3                                   |
| YP_933792.1    | HD-domain-containing protein                 | <i>Azoarcus</i> sp. BH72                                      |
| YP_423590.1    | HD-GYP domain-containing protein             | <i>Magnetospirillum magneticum</i> AMB-1                      |
| YP_001996362.1 | metal dependent phosphohydrolase             | <i>Chloroherpeton thalassium</i> ATCC 35110                   |
| NP_416794.1    | 5'-nucleotidase YfbR                         | <i>Escherichia coli</i> str. K-12 substr. MG1655              |
| EIE57001.1     | 5'-nucleotidase YfbR                         | <i>Escherichia coli</i> A127                                  |
| EHS94221.1     | UPF0207 protein YfbR                         | <i>Klebsiella oxytoca</i> 10-5245                             |
| YP_003742460.1 | unnamed protein product                      | <i>Erwinia billingiae</i> Eb661                               |
| YP_005401021.1 | unnamed protein product                      | <i>Rahnella aquatilis</i> HX2                                 |
| AFH92378.1     | 5'-nucleotidase                              | <i>Providencia stuartii</i> MRSN 2154                         |
| YP_005634320.1 | unnamed protein product                      | <i>Vibrio cholerae</i> LMA3984-4                              |
| YP_002506133.1 | unnamed protein product                      | <i>Clostridium cellulolyticum</i> H10                         |

## REFERENCES

1. Gasteiger E. HC, Gattiker A., Duvaud S., Wilkins M.R., Appel R.D., Bairoch A. (2005) Protein Identification and Analysis Tools on the ExPASy Server. *The Proteomics Protocols Handbook*, ed Walker JM (Humana Press), pp 571-607.
2. Bollinger JM, Jr. (1993) On the chemical mechanism of assembly of the tyrosyl radical-dinuclear iron cluster cofactor of *E.coli* ribonucleotide reductase. Ph. D. (Massachusetts Institute of Technology).
3. Dassama LMK, Boal AK, Krebs C, Rosenzweig AC, & Bollinger JM, Jr. (2012) Evidence that the  $\beta$  subunit of *Chlamydia trachomatis* ribonucleotide reductase is active with the manganese ion of its manganese(IV)/iron(III) cofactor in site 1. *J. Am. Chem. Soc.* 134(5):2520-2523.
4. Hammerschmidt F & Völlenkle H (1989) Absolute Konfiguration der (2-Amino-1-hydroxyethyl)phosphonsäure aus *Acanthamoeba castellanii* (Neff) - Darstellung der Phosphonsäure-Analoga von (+)- und (-)-Serin. *Liebigs Ann. Chem.* 1989(6):577-583.
5. Bollinger JM, Jr., *et al.* (1995) Use of rapid kinetics methods to study the assembly of the diferric-tyrosyl radical cofactor of *E. coli* ribonucleotide reductase. *Methods Enzymol.* 258:278-303.
6. Münck E (2000) Aspects of  $^{57}\text{Fe}$  Mössbauer spectroscopy. *Physical Methods in Bioinorganic Chemistry*, ed Que L, Jr. (University Science Books, Sausalito, CA), pp 287-319.
7. Otwinowski Z & Minor W (1997) Processing of X-ray diffraction data collected in oscillation mode. 276:307-326.
8. Emsley P, Lohkamp B, Scott WG, & Cowtan K (2010) Features and development of Coot. *Acta Crystallogr. D Biol. Crystallogr.* 66(Pt 4):486-501.
9. Adams PD, *et al.* (2010) PHENIX: a comprehensive Python-based system for macromolecular structure solution. *Acta Crystallogr. D Biol. Crystallogr.* 66(Pt 2):213-221.
10. Vonrhein C, Blanc E, Roversi P, & Bricogne G (2007) Automated structure solution with autoSHARP. *Methods Mol. Biol.* 364:215-230.
11. Cowtan K (2006) The Buccaneer software for automated model building. 1. Tracing protein chains. *Acta Crystallogr. D Biol. Crystallogr.* 62(Pt 9):1002-1011.
12. McCoy AJ, Grosse-Kunstleve RW, Storoni LC, & Read RJ (2005) Likelihood-enhanced fast translation functions. *Acta Crystallogr.* D61(4):458-464.
13. Schüttelkopf AW & van Aalten DM (2004) PRODRG: a tool for high-throughput crystallography of protein-ligand complexes. *Acta Crystallogr. D Biol. Crystallogr.* 60(Pt 8):1355-1363.
14. Altschul SF, Gish W, Miller W, Myers EW, & Lipman DJ (1990) Basic local alignment search tool. *J. Mol. Biol.* 215(3):403-410.
15. Katoh K & Standley DM (2013) MAFFT multiple sequence alignment software version 7: improvements in performance and usability. *Mol. Biol. Evol.* 30(4):772-780.
16. Thompson JD, Higgins DG, & Gibson TJ (1994) CLUSTAL W: improving the sensitivity of progressive multiple sequence alignment through sequence weighting, position-specific gap penalties and weight matrix choice. *Nucleic Acids Res.* 22(22):4673-4680.

17. Tamura K, *et al.* (2011) MEGA5: molecular evolutionary genetics analysis using maximum likelihood, evolutionary distance, and maximum parsimony methods. *Mol. Biol. Evol.* 28(10):2731-2739.
18. Saitou N & Nei M (1987) The neighbor-joining method: a new method for reconstructing phylogenetic trees. *Mol. Biol. Evol.* 4(4):406-425.
19. Takahashi K & Nei M (2000) Efficiencies of fast algorithms of phylogenetic inference under the criteria of maximum parsimony, minimum evolution, and maximum likelihood when a large number of sequences are used. *Mol. Biol. Evol.* 17(8):1251-1258.
20. Larkin MA, *et al.* (2007) Clustal W and Clustal X version 2.0. *Bioinformatics* 23(21):2947-2948.
